# Supplementary material for: Multifaceted Aspects of HIV-1 Nucleocapsid Inhibition by TAR-Targeting Peptidyl-Anthraquinones Bearing Terminal Aromatic Moieties
Source: MDPI journal article supplement (doi:10.3390/v14102133), 2022-09-27

# Supporting Information

## Multifaceted aspects of HIV-1 nucleocapsid inhibition by TAR-targeting peptidyl-anthraquinones bearing terminal aromatic moieties

Alice Sosic <sup>1</sup>, Francesco Frecentese <sup>2</sup>, Giulia Olivato <sup>1</sup>, Caterina Carraro <sup>1</sup>, Elia Gamba <sup>1</sup>, Daniele Rollo <sup>1</sup> and Barbara Gatto <sup>1,\*</sup>

<sup>1</sup> Department of Pharmaceutical and Pharmacological Sciences, University of Padova, Via Francesco Marzolo 5, 35131 Padova (Italy)

<sup>2</sup> Dipartimento di Farmacia, Università di Napoli "Federico II" Via D. Montesano 49, 80131 Napoli (Italy)

\* Correspondence: [barbara.gatto@unipd.it](mailto:barbara.gatto@unipd.it)

### Table of content:

**Scheme S1:** General synthetic pathway for the preparation of the anthraquinone derivatives included in the study and their characterization. **P.2**

**Figure S1:** Dose-response curves resulting from the NC-mediated melting in the presence of 2,6-AQs on TAR substrate. **P.4**

**Table S1:** Inhibition of NC-mediated melting of cTAR by AQ-AA<sub>1</sub>-L-Tyr (red columns) and AQ-AA<sub>1</sub>-D-Tyr (green columns). **P.5**

**Figure S2:** Representative ESI-MS spectra of samples obtained by mixing TAR with compounds of the L-Tyr and D-Tyr series. **P.6**

**Table S2:** Binding stoichiometries of compound-nucleic acid complexes detected in the ESI-MS spectra. **P.7**

**Table S3:** Variations of TAR, cTAR and TAR/cTAR hybrid melting temperature ( $\Delta T_m$ ) in the presence of an increasing concentration of the compounds of the L-Tyr and D-Tyr series. **P.7**

**Figure S3:** Representative ESI-MS spectra of samples obtained by mixing NC with compounds of the L-Tyr and D-Tyr series. **P.8**

**Figure S4:** Representative ESI-MS spectra of samples obtained by mixing Tat with compounds of the L-Tyr and D-Tyr series. **P.9**

**Table S4:** Experimental and calculated monoisotopic masses (Da) of 2,6-AQ:Tat complexes. **P.10**

**Figure S5:** ESI-MS spectra of samples obtained by adding NC to the preformed ligand•TAR complexes. **P.11**

**Figure S6:** Parallel Artificial Membrane Permeation Assays (PAMPA). **P.12**

**Scheme S1. General synthetic pathway for the preparation of the anthraquinone derivatives included in the study and their characterization.**

Reagents and conditions: (i) HBTU, DMAP, DMF; (ii) 33% N,N-diethylamine, THF; (iii) TFA/H<sub>2</sub>O.

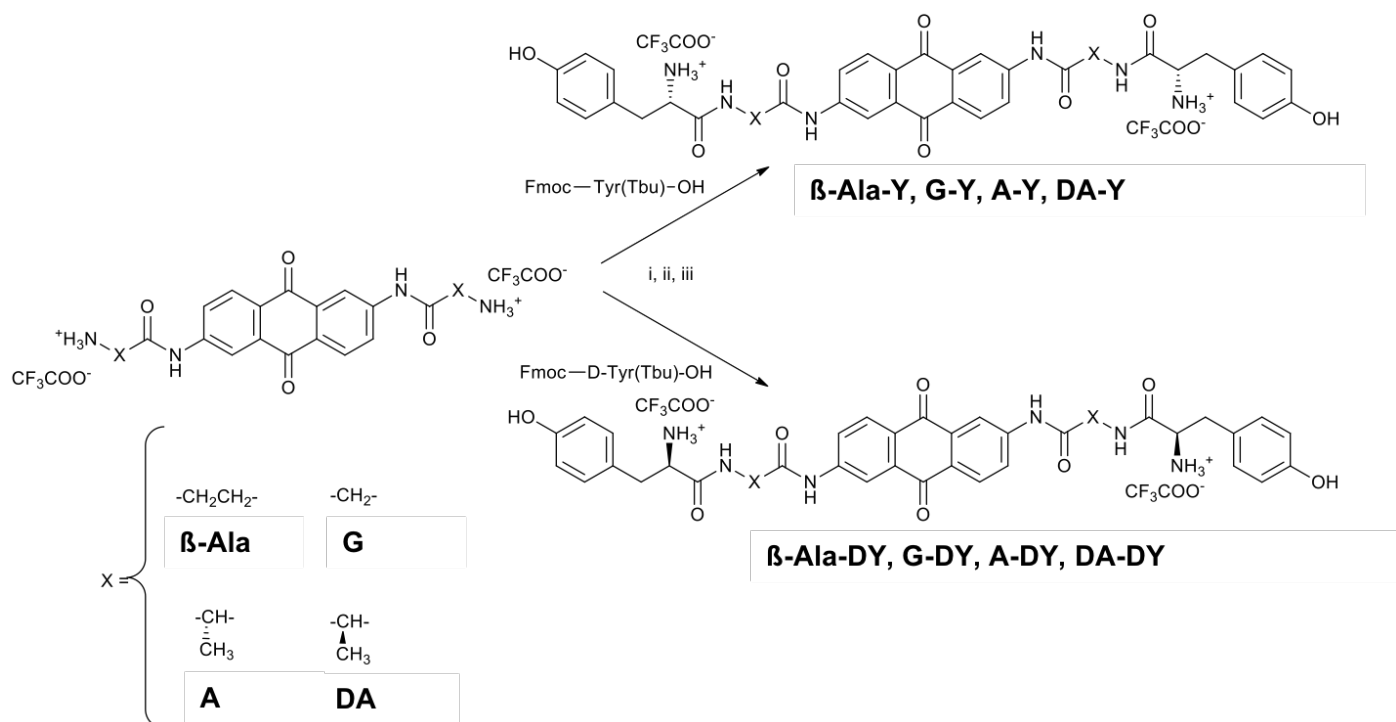

**(2S,2'S)-N,N'-(((9,10-dioxo-9,10-dihydroanthracene-2,6-diyl)bis(azanediyl))bis(3-oxopropane-3,1-diyl))bis(2-amino-3-(4-hydroxyphenyl)propanamide)-bis-trifluoroacetate ( $\beta$ -Ala-Y)**

N,N'-(9,10-dioxo-9,10-dihydroanthracene-2,6-diyl)bis(3-aminopropanamide)-bis-trifluoroacetate ( $\beta$ -Ala, 128 mg, 0.21 mmol) was dissolved in dry DMF (9 mL), and DMAP (282 mg, 2.31 mmol), Fmoc-Tyr(Tbu)-OH (965 mg, 2.1 mmol), and HBTU (796 mg, 2.1 mmol) were added. The resulting solution was stirred at room temperature for 24 hours, then poured into Et<sub>2</sub>O and centrifuged. The solid obtained was washed with Et<sub>2</sub>O and the final product was dried in vacuo and used in the next step without any further purification. In order to remove the Fmoc- protecting group, the solid obtained was reacted with a 33% diethylamine solution in THF (20 mL) for 2 hours, poured into Et<sub>2</sub>O and centrifuged. The solid obtained was washed with Et<sub>2</sub>O and water and then dried in vacuo. Subsequently, the obtained solid was reacted with a solution of trifluoroacetic acid in water (9:1, v/v, 10 mL) for 1 hour and then poured into Et<sub>2</sub>O. The resulting suspension was centrifuged. The solid obtained was washed with Et<sub>2</sub>O and dried in vacuo. Purification by preparative RP-HPLC afforded the pure compound  $\beta$ -Ala-Y as an intense orange solid. Yield: 68%. Orange solid. K' (HPLC): 4.6. ESI-MS: 707.4 [M + H]<sup>+</sup>; 354.4 [M + 2H]<sup>++</sup>.

**(2S,2'S)-N,N'-(((9,10-dioxo-9,10-dihydroanthracene-2,6-diyl)bis(azanediyl))bis(2-oxoethane-2,1-diyl))bis(2-amino-3-(4-hydroxyphenyl)propanamide)-bis-trifluoroacetate (G-Y)**

The compound was obtained with the same coupling procedure adopted for  $\beta$ -Ala-Y, starting from G and Fmoc-Tyr(Tbu)-OH. Yield: 64%. Orange solid. K' (HPLC): 4.7. ESI-MS: 679.4 [M + H]<sup>+</sup>; 340.3 [M + 2H]<sup>++</sup>.

**(2S,2'S)-N,N'-((2S,2'S)-((9,10-dioxo-9,10-dihydroanthracene-2,6-diyl)bis-(azanediyl))bis(1-oxopropane-2,1-diyl))bis(2-amino-3-(4-hydroxyphenyl)-propanamide)-bis-trifluoroacetate (A-Y)**

The compound was obtained with the same coupling procedure adopted for **β-Ala-Y**, starting from **A** and Fmoc-Tyr(Tbu)-OH. Yield: 56%. Orange solid. K' (HPLC): 4.3. ESI-MS: 707.4 [M + H]<sup>+</sup>; 354.2 [M + 2H]<sup>++</sup>.

**(2S,2'S)-N,N'-((2R,2'R)-((9,10-dioxo-9,10-dihydroanthracene-2,6-diyl)bis-(azanediyl))bis(1-oxopropane-2,1-diyl))bis(2-amino-3-(4-hydroxyphenyl)-propanamide)-bis-trifluoroacetate (DA-Y)**

The compound was obtained with the same coupling procedure adopted for **β-Ala-Y**, starting from **DA** and Fmoc-Tyr(Tbu)-OH. Yield: 62%. Orange solid. K' (HPLC): 4.4. ESI-MS: 707.6 [M + H]<sup>+</sup>; 354.5 [M + 2H]<sup>++</sup>.

**(2R,2'R)-N,N'-(((9,10-dioxo-9,10-dihydroanthracene-2,6-diyl)bis(azanediyl))bis(3-oxopropane-3,1-diyl))bis(2-amino-3-(4-hydroxyphenyl)propanamide)-bis-trifluoroacetate (β-Ala-DY)**

The compound was obtained with the same coupling procedure adopted for **β-Ala-Y**, starting from **β-Ala** and Fmoc-D-Tyr(Tbu)-OH. Yield: 59%. Orange solid. K' (HPLC): 4.6. ESI-MS: 707.3 [M + H]<sup>+</sup>; 354.3 [M + 2H]<sup>++</sup>.

**(2R,2'R)-N,N'-(((9,10-dioxo-9,10-dihydroanthracene-2,6-diyl)bis(azanediyl))bis(2-oxoethane-2,1-diyl))bis(2-amino-3-(4-hydroxyphenyl)propanamide)-bis-trifluoroacetate (G-DY)**

The compound was obtained with the same coupling procedure adopted for **β-Ala-Y**, starting from **G** and Fmoc-D-Tyr(Tbu)-OH. Yield: 55%. Orange solid. K' (HPLC): 4.6. ESI-MS: 679.3 [M + H]<sup>+</sup>; 340.3 [M + 2H]<sup>++</sup>.

**(2R,2'R)-N,N'-((2S,2'S)-((9,10-dioxo-9,10-dihydroanthracene-2,6-diyl)bis-(azanediyl))bis(1-oxopropane-2,1-diyl))bis(2-amino-3-(4-hydroxyphenyl)-propanamide)-bis-trifluoroacetate (A-DY)**

The compound was obtained with the same coupling procedure adopted for **β-Ala-Y**, starting from **A** and Fmoc-D-Tyr(Tbu)-OH. Yield: 54%. Orange solid. K' (HPLC): 4.3. ESI-MS: 707.3 [M + H]<sup>+</sup>; 354.3 [M + 2H]<sup>++</sup>.

**(2R,2'R)-N,N'-((2R,2'R)-((9,10-dioxo-9,10-dihydroanthracene-2,6-diyl)bis-(azanediyl))bis(1-oxopropane-2,1-diyl))bis(2-amino-3-(4-hydroxyphenyl)-propanamide)-bis-trifluoroacetate (DA-DY)**

The compound was obtained with the same coupling procedure adopted for **β-Ala-Y**, starting from **DA** and Fmoc-D-Tyr(Tbu)-OH. Yield: 49%. Orange solid. K' (HPLC): 4.4. ESI-MS: 707.4 [M + H]<sup>+</sup>; 354.5 [M + 2H]<sup>++</sup>.

Figure S1. Dose-response curves resulting from the NC-mediated melting in the presence of 2,6-AQs on TAR substrate.

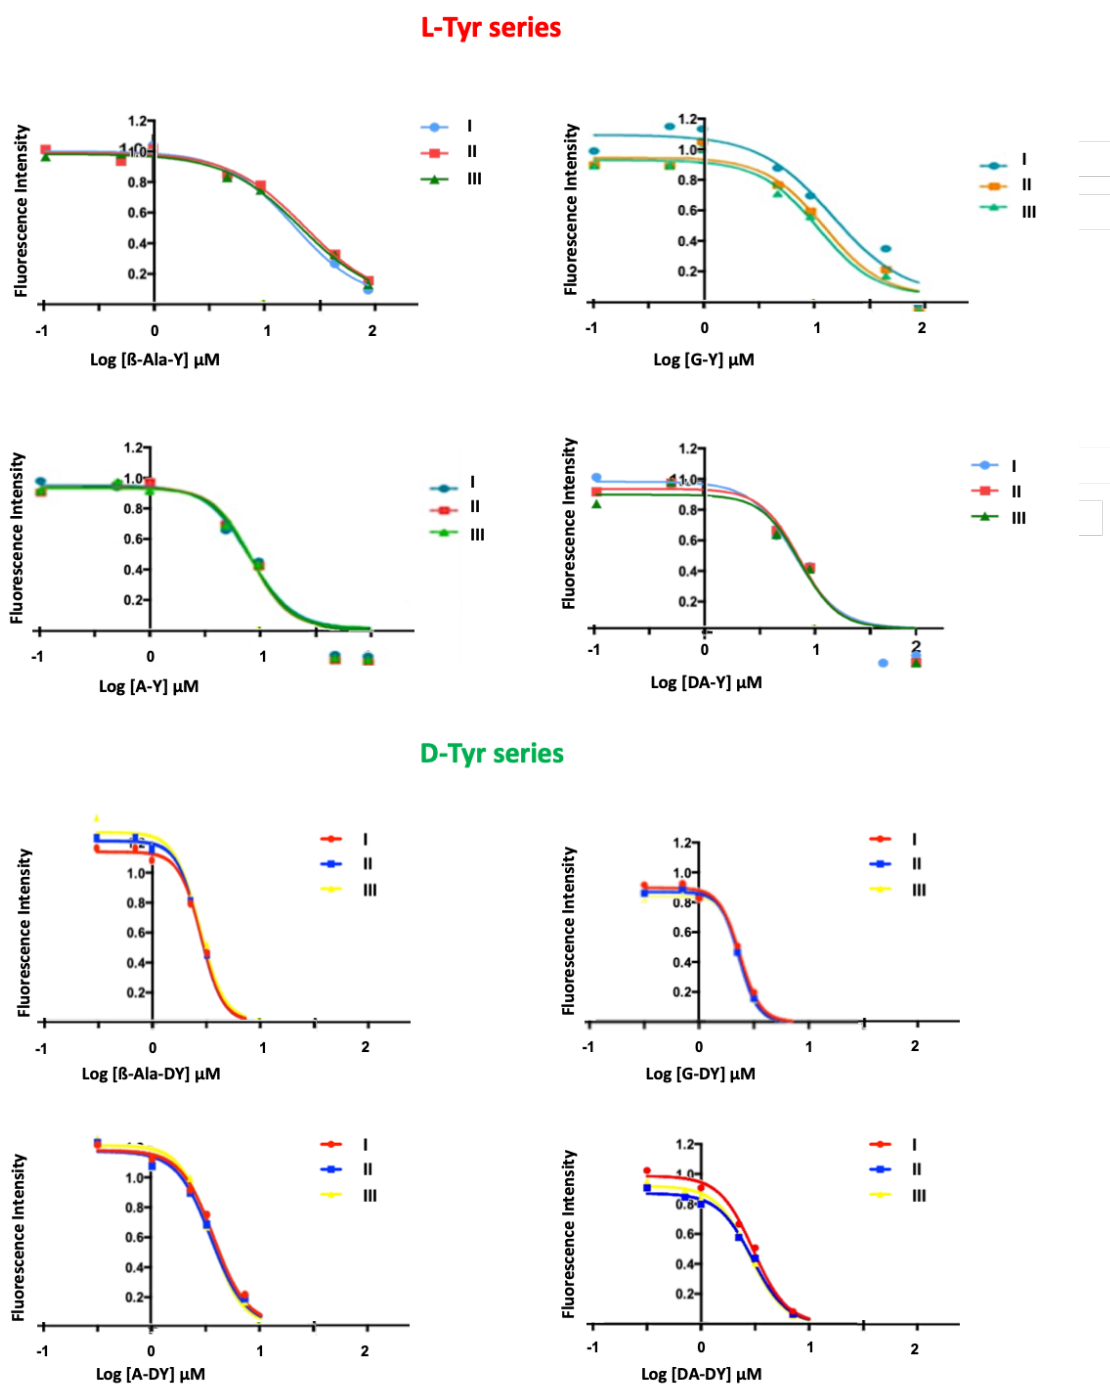

**Table S1. Inhibition of NC-mediated melting of cTAR by AQ-AA<sub>1</sub>-L-Tyr (red columns) and AQ-AA<sub>1</sub>-D-Tyr (green columns).**

| AQ-AA <sub>1</sub> -L-Tyr | IC <sub>50</sub> cTAR (μM) | AQ-AA <sub>1</sub> -D-Tyr | IC <sub>50</sub> cTAR (μM) |
|---------------------------|----------------------------|---------------------------|----------------------------|
| β-Ala-Y                   | 19.4 ± 0.40                | β-Ala-DY                  | 8.17 ± 0.53                |
| G-Y                       | 15.2 ± 1.49                | G-DY                      | 5.14 ± 0.28                |
| A-Y                       | 10.7 ± 0.31                | A-DY                      | 10.4 ± 1.73                |
| DA-Y                      | 8.85 ± 0.51                | DA-DY                     | 10.2 ± 0.86                |

**Figure S2. Representative ESI-MS spectra of samples obtained by mixing TAR with compounds of the L-Tyr and D-Tyr series.** In the figure are reported the ESI-MS spectra acquired in negative ion mode of samples obtained by mixing 1  $\mu$ M of TAR with 10  $\mu$ M of (A)  $\beta$ -Ala-Y, (B) G-Y, (C) A-Y, (D) DA-Y, (E)  $\beta$ -Ala-DY, (F) G-DY, (G) A-DY, (H) DA-DY in 150 mM ammonium acetate. Symbol ■ corresponds to TAR RNA substrate and the red ● to the ligand. The stoichiometry of bound species is graphically represented in each spectrum. Lower intensity signals near free/bound species consist of typical sodium and ammonium adducts.

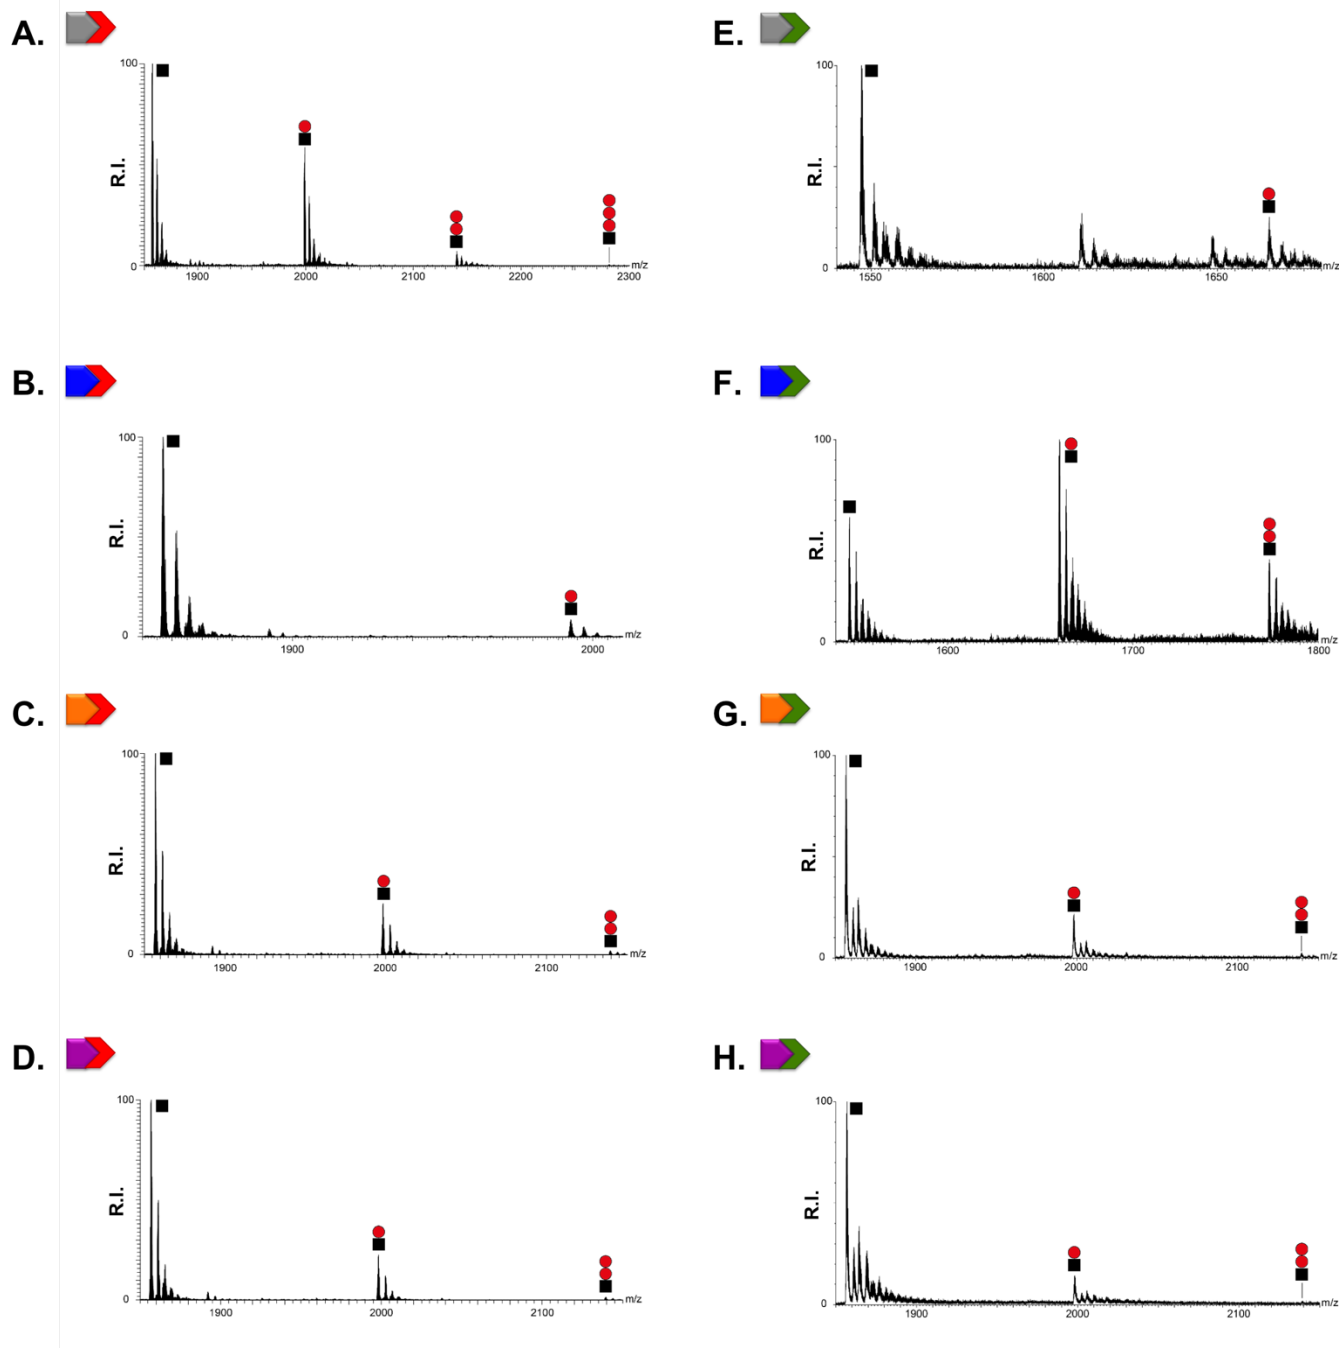

**Table S2. Binding stoichiometries of compound-nucleic acid complexes detected in the ESI-MS spectra.** The interactions established by AQ-L-Tyr and AQ-D-Tyr compounds with TAR constructs employed as target produced different binding stoichiometries. Data are elaborated from the negative ion mode spectra obtained for 10:1 anthraquinone:TAR molar ratio in 150 mM ammonium acetate.

| Compound        | 1:1 AQ:TAR | 2:1 AQ:TAR | 3:1 AQ:TAR |
|-----------------|------------|------------|------------|
| <b>β-Ala-Y</b>  | X          | X          | X          |
| <b>G-Y</b>      | X          |            |            |
| <b>A-Y</b>      | X          | X          |            |
| <b>DA-Y</b>     | X          | X          |            |
| <b>β-Ala-DY</b> | X          |            |            |
| <b>G-DY</b>     | X          | X          |            |
| <b>A-DY</b>     | X          | X          |            |
| <b>DA-DY</b>    | X          | X          |            |

**Table S3. Variations of TAR melting temperature ( $\Delta T_m$ ) in the presence of an increasing concentration of the compounds of the L-Tyr and D-Tyr series.** Reported values are the mean  $\pm$  standard error of the mean (SEM) of triplicate experiments performed on samples containing 1  $\mu$ M of nucleic acid substrate and 10  $\mu$ M of compound. The reference  $T_m$  value for TAR, cTAR and the TAR/cTAR hybrid in the absence of compound are 69.3, 53.8 and 69.4  $^{\circ}$ C, respectively.

| L-Tyr          | $\Delta T_m$ TAR ( $^{\circ}$ C) | $\Delta T_m$ cTAR ( $^{\circ}$ C) | $\Delta T_m$ TAR/cTAR ( $^{\circ}$ C) | D-Tyr           | $\Delta T_m$ TAR ( $^{\circ}$ C) | $\Delta T_m$ cTAR ( $^{\circ}$ C) | $\Delta T_m$ TAR/cTAR ( $^{\circ}$ C) |
|----------------|----------------------------------|-----------------------------------|---------------------------------------|-----------------|----------------------------------|-----------------------------------|---------------------------------------|
| <b>β-Ala-Y</b> | $0.03 \pm 0.05$                  | $0.23 \pm 0.27$                   | $0.60 \pm 0.05$                       | <b>β-Ala-DY</b> | $2.62 \pm 0.11$                  | $5.81 \pm 0.18$                   | $1.06 \pm 0.14$                       |
| <b>G-Y</b>     | $1.29 \pm 0.04$                  | $2.38 \pm 0.24$                   | $1.19 \pm 0.28$                       | <b>G-DY</b>     | $2.05 \pm 0.20$                  | $3.34 \pm 1.31$                   | $0.94 \pm 0.04$                       |
| <b>A-Y</b>     | $2.88 \pm 0.04$                  | $4.48 \pm 0.14$                   | $1.10 \pm 0.24$                       | <b>A-DY</b>     | $0.40 \pm 0.74$                  | $2.50 \pm 1.44$                   | $0.41 \pm 0.06$                       |
| <b>DA-Y</b>    | $0.52 \pm 0.05$                  | $2.32 \pm 0.03$                   | $1.10 \pm 0.01$                       | <b>DA-DY</b>    | $0.34 \pm 0.09$                  | $2.37 \pm 0.53$                   | $0.41 \pm 0.11$                       |

**Figure S3. Representative ESI-MS spectra of samples obtained by mixing NC with compounds of the L-Tyr and D-Tyr series.** In the figure are reported the ESI-MS spectra acquired in positive ion mode of samples obtained by mixing 10  $\mu$ M of NC with 100  $\mu$ M of (A)  $\beta$ -Ala-Y, (B) G-Y, (C) A-Y, (D) DA-Y, (E)  $\beta$ -Ala-DY, (F) G-DY, (G) A-DY, (H) DA-DY in 150 mM ammonium acetate. The grey  $\blacktriangle$  symbol corresponds to NC protein and the red  $\bullet$  to the ligand. The stoichiometry of bound species is graphically represented in each spectrum. Lower intensity signals near free/bound species consist of typical sodium and ammonium adducts.

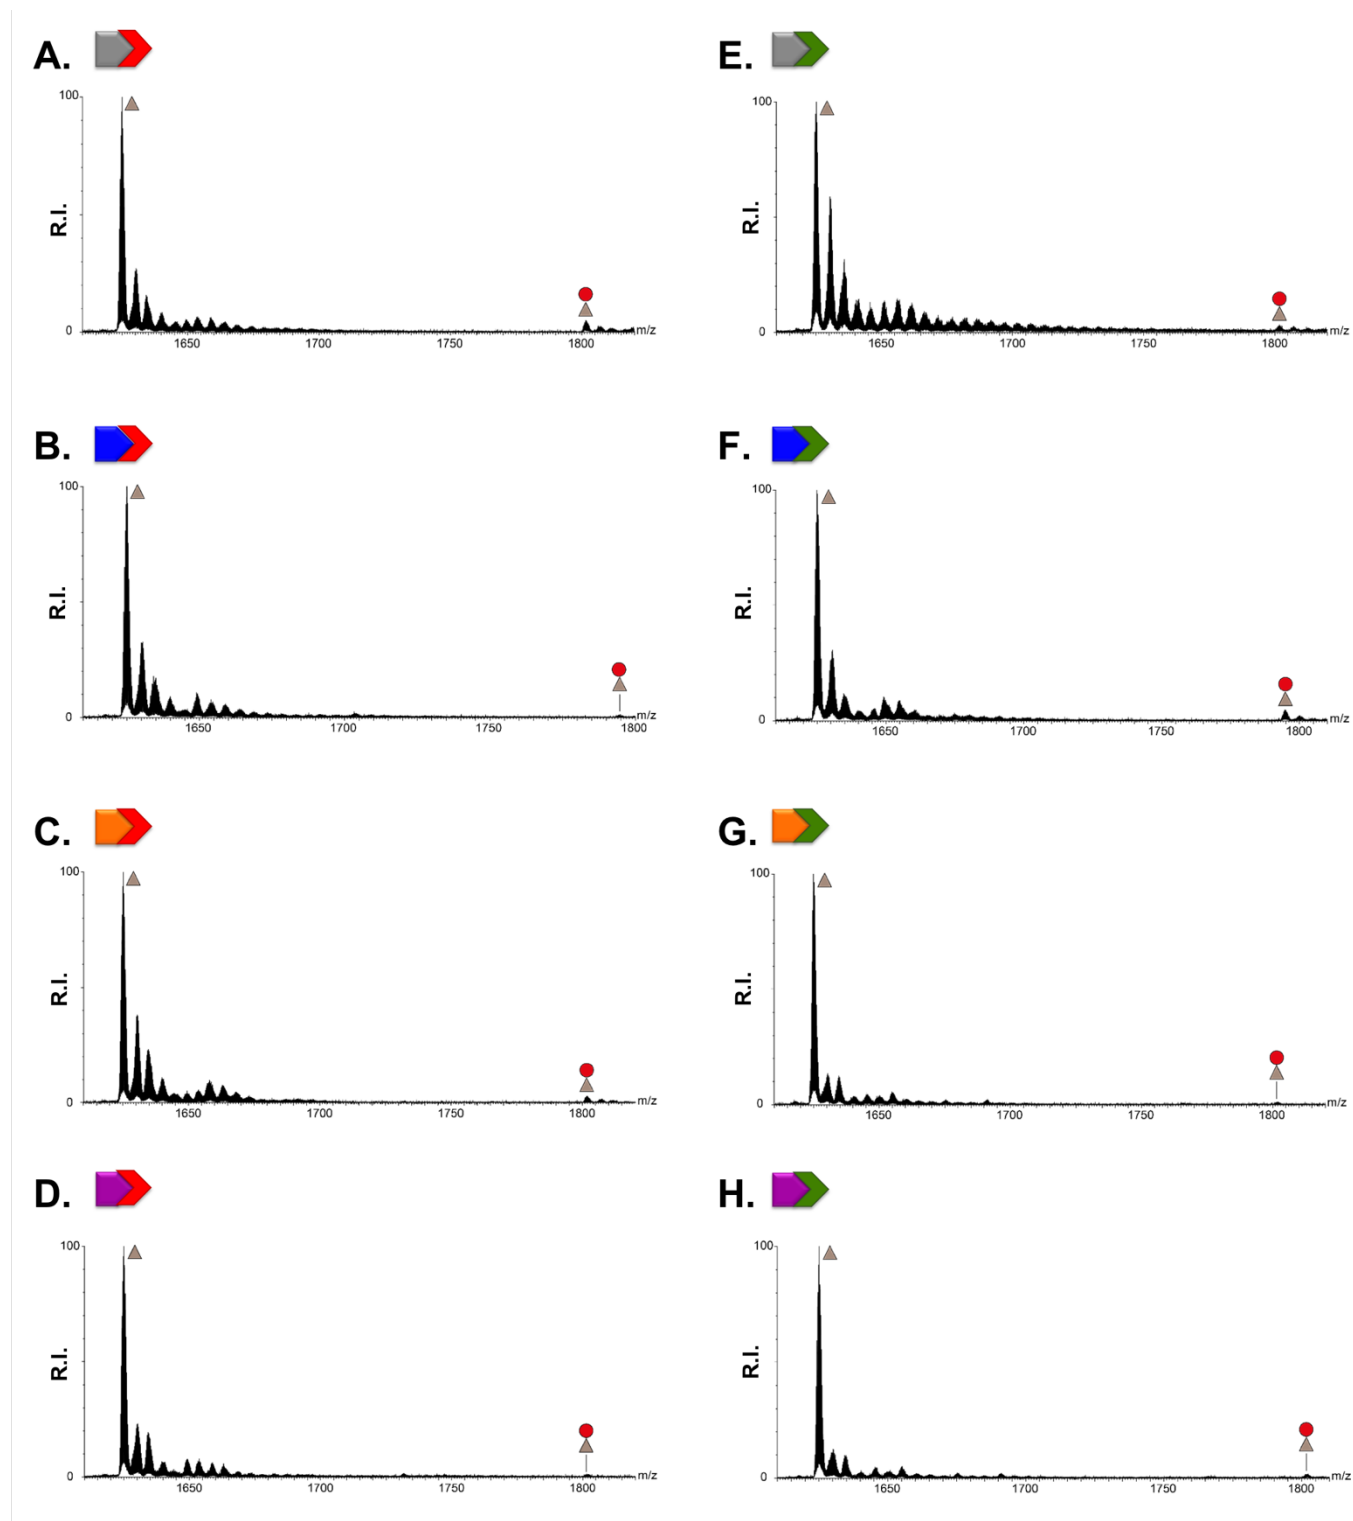



**Figure S4. Representative ESI-MS spectra of samples obtained by mixing Tat with compounds of the L-Tyr and D-Tyr series.** In the figure are reported the ESI-MS spectra acquired in positive ion mode of samples containing 10  $\mu\text{M}$  of Tat (A), and obtained mixing 10  $\mu\text{M}$  of Tat with 100  $\mu\text{M}$  of  $\beta\text{-Ala-Y}$  (B) in 150 mM ammonium acetate. In both spectra A and B, the peak detected at  $m/z$  698.98 corresponds to the Tat protein. In spectrum B, compound  $\beta\text{-Ala-Y}$  was identified at  $m/z$  707.27. Lower intensity signals consist of typical sodium and ammonium adducts.

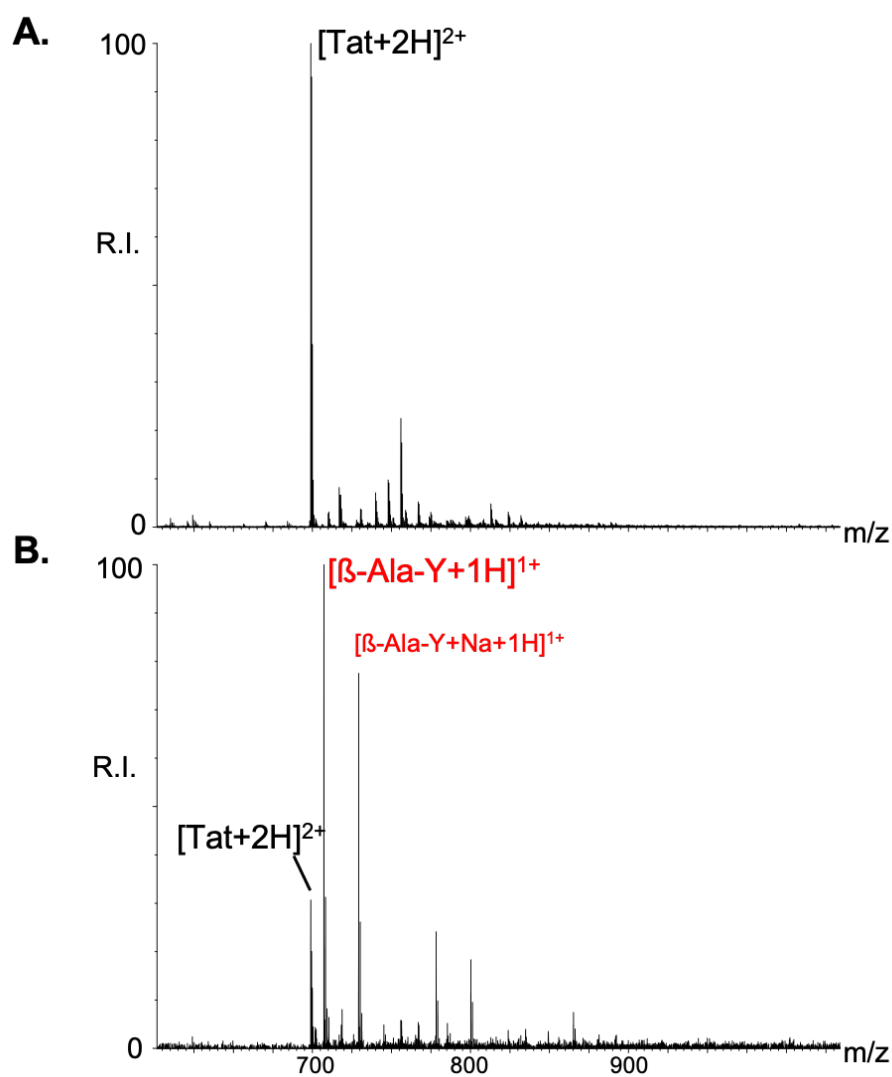

**Table S4. Experimental and calculated monoisotopic masses (Da) of 2,6-AQ:Tat complexes.** Expected masses of 1:1 complexes were calculated from the sequence of Tat protein (GRKKRRQRRR) and the elemental composition of each compound. No complexes were detected in the ESI-MS spectra.

| Compound        | 1:1 AQ:Tat complex     |                      |
|-----------------|------------------------|----------------------|
|                 | Experimental Mass (Da) | Calculated Mass (Da) |
| <b>β-Ala-Y</b>  | Not detected           | 2102.19              |
| <b>G-Y</b>      | Not detected           | 2074.17              |
| <b>A-Y</b>      | Not detected           | 2102.19              |
| <b>DA-Y</b>     | Not detected           | 2102.19              |
| <b>β-Ala-DY</b> | Not detected           | 2102.19              |
| <b>G-DY</b>     | Not detected           | 2074.17              |
| <b>A-DY</b>     | Not detected           | 2102.19              |
| <b>DA-DY</b>    | Not detected           | 2102.19              |

**Figure S5. ESI-MS spectra of samples obtained by adding NC to the preformed ligand•TAR complexes.** The tested compounds are (A) A-Y, (B) A-DY, (C) DA-Y, (D) DA-DY. Lower intensity signals near free/bound species consist of typical sodium and ammonium adducts. Gray ▲ corresponds to NC protein; ■ to the TAR RNA substrate; and red ● to the ligand. For the sake of clarity only the 5+ and 6+ charge states of the binary (RNA-ligand) and ternary (RNA-ligand- protein) complexes are labeled in the spectra.

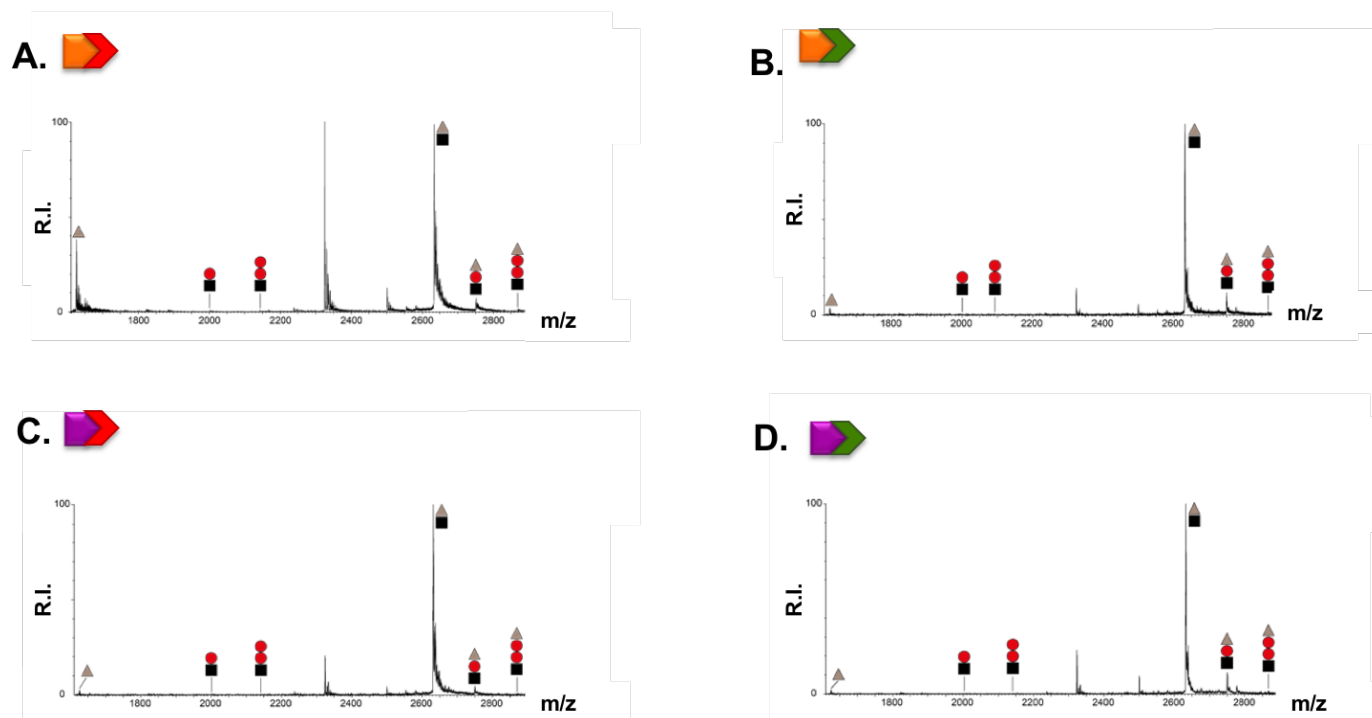

**Figure S6. Parallel Artificial Membrane Permeation Assays (PAMPA).** The graph reports the percentage of each compound detected in each compartment after 24 hours of incubation. In these assays, we included  **$\beta$ -Ala-DK** and  **$\beta$ -Ala-DOrn** as representative derivatives of the  $\beta$ -Ala series of aliphatic charged compounds bearing D-Lysine and D-Ornithine as terminal residue, respectively.

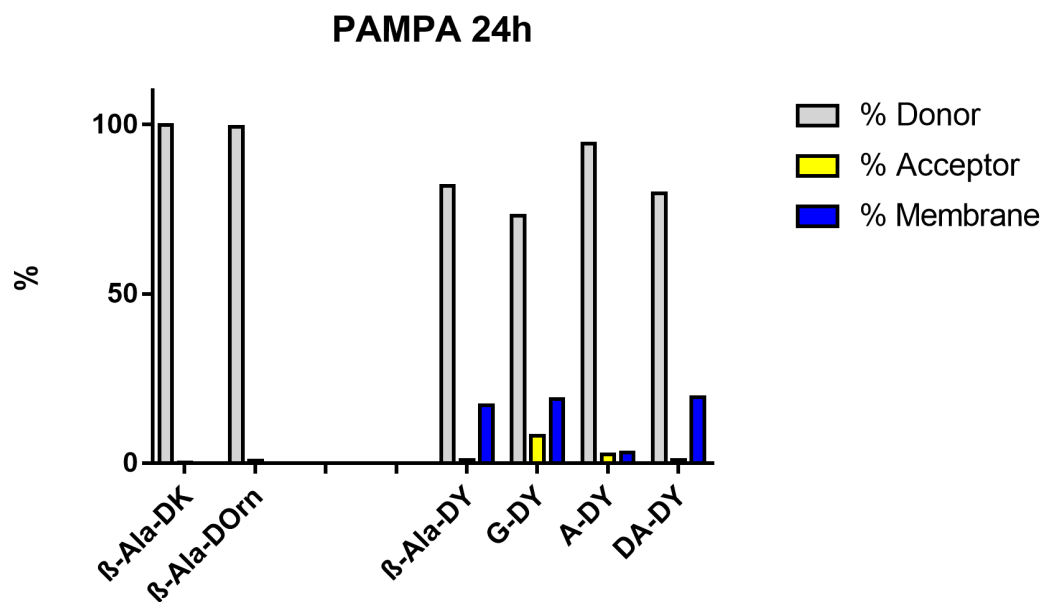

Supplement: s1 [file s1]
